# Supplementary material for: Histone dynamics mediate DNA unwrapping and sliding in nucleosomes
Source: PubMed Central journal article supplement (PMC8062685; doi:10.1038/s41467-021-22636-9), 2021-04-22
Supplement: 41467_2021_22636_MOESM1_ESM.pdf [file 41467_2021_22636_MOESM1_ESM.pdf]

# SUPPLEMENTARY INFORMATION

## Histone dynamics mediate DNA unwrapping and sliding in nucleosomes

Grigoriy A. Armeev<sup>1,2</sup>, Anastasia S. Kniazeva<sup>2</sup>, Galina A. Komarova<sup>3</sup>, Mikhail P. Kirpichnikov<sup>1,4</sup>, and Alexey K. Shaytan<sup>1,2,5,\*</sup>

<sup>1</sup>Department of Biology, Lomonosov Moscow State University, 1-12 Leninskie Gory, Moscow, 119991, Russia

<sup>2</sup>Sirius University of Science and Technology, 1 Olympic Ave, Sochi, 354340, Russia

<sup>3</sup>Department of Physics, Lomonosov Moscow State University, 1-2 Leninskie Gory, Moscow, 119991, Russia

<sup>4</sup>Shemyakin-Ovchinnikov Institute of Bioorganic Chemistry, Russian Academy of Sciences, 16/10 Miklukho-Maklaya st., Moscow, 117997, Russia

<sup>5</sup>Bioinformatics Lab, Faculty of Computer Science, HSE University, 11 Pokrovsky boulevard, Moscow, 109028, Russia

These authors contributed equally: Grigoriy A. Armeev, Anastasia S. Kniazeva.

\*email: shaytan\_ak@mail.bio.msu.ru

Supplementary Note 1: Detailed simulated systems' description.

**NCP<sub>147</sub>** - based on an X-ray structure of NCP with PDB ID 1KX5 [1]. It has 147 bp DNA derived from a human alpha-satellite DNA sequence repeat. Octamer is based on canonical histones of *X. laevis*. DNA sequence forms two symmetric palindromic 73 bp segments in the structure plus one base pair is strictly at the dyad. The system has full-length histone tails. Symmetry related histone tails were put in identical starting conformations.

**NCP<sub>147</sub><sup>tt</sup>** - analogous to NCP<sub>147</sub>, but histone tails are truncated in this system.

**NCP<sub>146</sub><sup>tt</sup>** - based on an X-ray structure of NCP with PDB ID 1AOI [2]. It has 146 bp of palindromic DNA derived from human X-chromosome alpha-satellite DNA repeat. Octamer is based on canonical histones of *X. laevis*. Histone tails are truncated in this system.

**NCP<sub>145</sub><sup>tt</sup>** - based on an X-ray structure of NCP with PDB ID 3LZ0 [3]. It has 145 bp of Widom 601 strong positioning DNA sequence. Octamer is based on canonical histones of *X. laevis*. Histone tails are truncated in this system.

**NCP<sub>147</sub><sup>fixed</sup>** - same as NCP<sub>147</sub>, but histone folds' C- $\alpha$ -atoms are fixed (restraints of 1000 kJ mol<sup>-1</sup> nm<sup>-2</sup>).

System parameters are further presented in Supplementary Table 1.

Supplementary Table 1: Parameters of the simulated systems.

| Name                                | PDB ID <sup>a</sup> | Box volume, nm <sup>3</sup> | Atom number | Water molecules | Ions number, Na/Cl | Ionic strength by water volume, mM | Ionic strength by box volume, mM | Bulk ionic strength, <sup>b</sup> mM | Minimum periodic im-age distance, nm | Time, $\mu$ s |
|-------------------------------------|---------------------|-----------------------------|-------------|-----------------|--------------------|------------------------------------|----------------------------------|--------------------------------------|--------------------------------------|---------------|
| NCP <sub>147</sub>                  | 1KX5                | 2658                        | 267K        | 81K             | 363/219            | 150                                | 136                              | 172                                  | 2.089                                | 15            |
| NCP <sup>#</sup> <sub>147</sub>     | 1KX5                | 2914                        | 293K        | 90K             | 468/242            | 149                                | 137                              | 168                                  | 2.53                                 | 10            |
| NCP <sup>#</sup> <sub>145</sub>     | 3LZ0                | 2817                        | 283K        | 87K             | 459/237            | 151                                | 139                              | 168                                  | 2.47                                 | 15            |
| NCP <sup>#</sup> <sub>146</sub>     | 1AOI                | 2641                        | 265K        | 81K             | 445/221            | 151                                | 138                              | 178                                  | 3.52                                 | 8             |
| NCP <sup>fixed</sup> <sub>147</sub> | 1KX5                | 2425                        | 245K        | 73K             | 343/199            | 151                                | 136                              | 170                                  | 1.48                                 | 8             |

<sup>a</sup> PDB database ID used to derive the simulated system model.

<sup>b</sup> Calculated at a distance beyond 1 nm from the nucleosome.

<sup>c</sup> See Figure 1e for the location of truncation sites.

Supplementary Table 2: Trajectory averaged number of contacts between DNA and histone globular core or histone tails for NCP<sub>147</sub> system

| <b>Classification method</b> | <b>Contact types</b> | <b>Histone core<sup>a</sup></b> | <b>Histone tails</b> |
|------------------------------|----------------------|---------------------------------|----------------------|
| All contacts                 |                      | 601                             | 1219                 |
| Nucleotide parts             | Phosphate            | 458                             | 583                  |
|                              | Base                 | 10                              | 288                  |
|                              | Sugar                | 133                             | 347                  |
| Amino acids parts            | Backbone             | 200                             | 466                  |
|                              | Side chain           | 401                             | 753                  |
| Interaction types            | Hydrophobic          | 22                              | 105                  |
|                              | Salt bridges         | 34                              | 29                   |
|                              | Polar                | 66                              | 152                  |
|                              | hydrogen bonds       | 34                              | 263                  |
| DNA groove                   | Major                | 1                               | 123                  |
|                              | Minor                | 9                               | 162                  |

<sup>a</sup> Core residues are non-tail residues. See tail regions definition in Figure 1e.

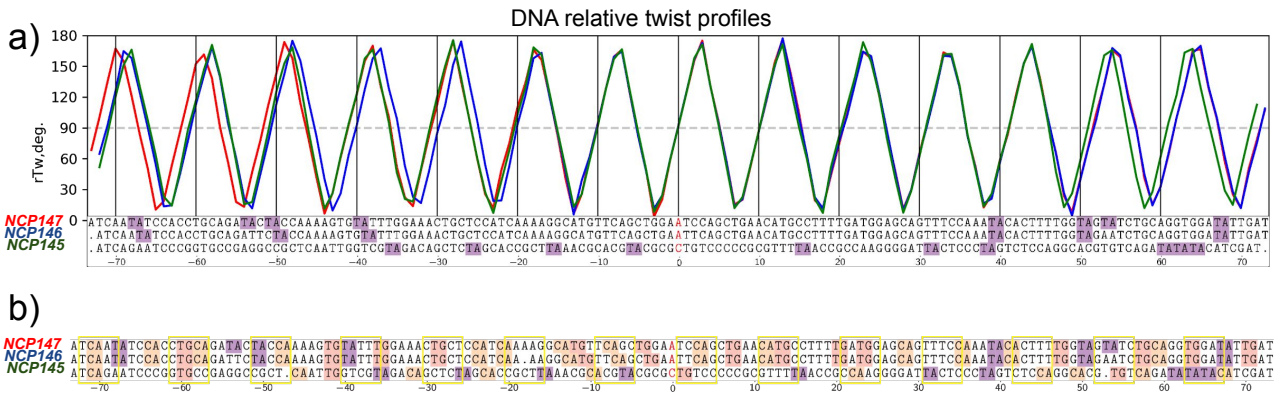

Supplementary Figure 1: a) Sequence alignment (by the dyad position) of the DNA sequences (top chain) used in the simulated systems and their relative twist profiles (rTw) in X-ray structures (indicating the orientation of DNA base pairs relative to the octamer surface - see Methods). Red nucleotides mark the dyad position, flexible TA dinucleotides are highlighted in purple; b) Structure based sequence alignment for the top DNA strand (chain I) generated by USCF Chimera [4]. Indels around SHL  $\pm 5$  are detected (the results for the bottom strand are nearly equivalent). Yellow frames mark regions, where a minor groove faces towards the histone octamer; pyrimidine/purine dinucleotides are highlighted (TA - purple, CA - apricot, TG - pink).

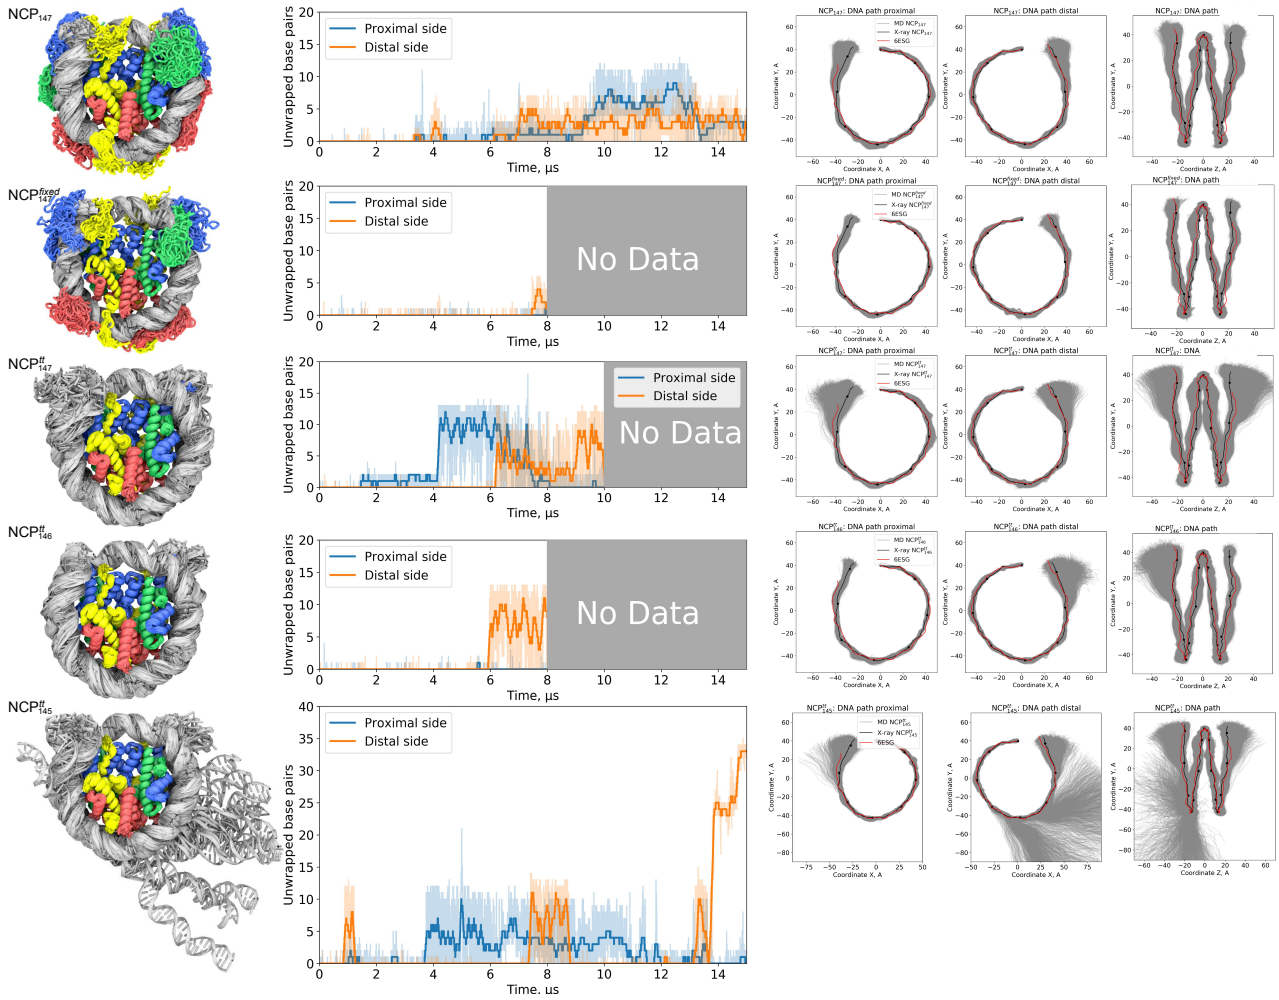

Supplementary Figure 2: Overview of the dynamics of the simulated systems. First column: overlay of snapshots along the whole MD trajectory for each system (every 100 ns). Second column: plots of the extent of DNA unwrapping (as estimated by displacement of base pair centers). Right three columns: 2D projections of DNA path (base pair centers) in nucleosome reference frame for frames along the MD trajectory.

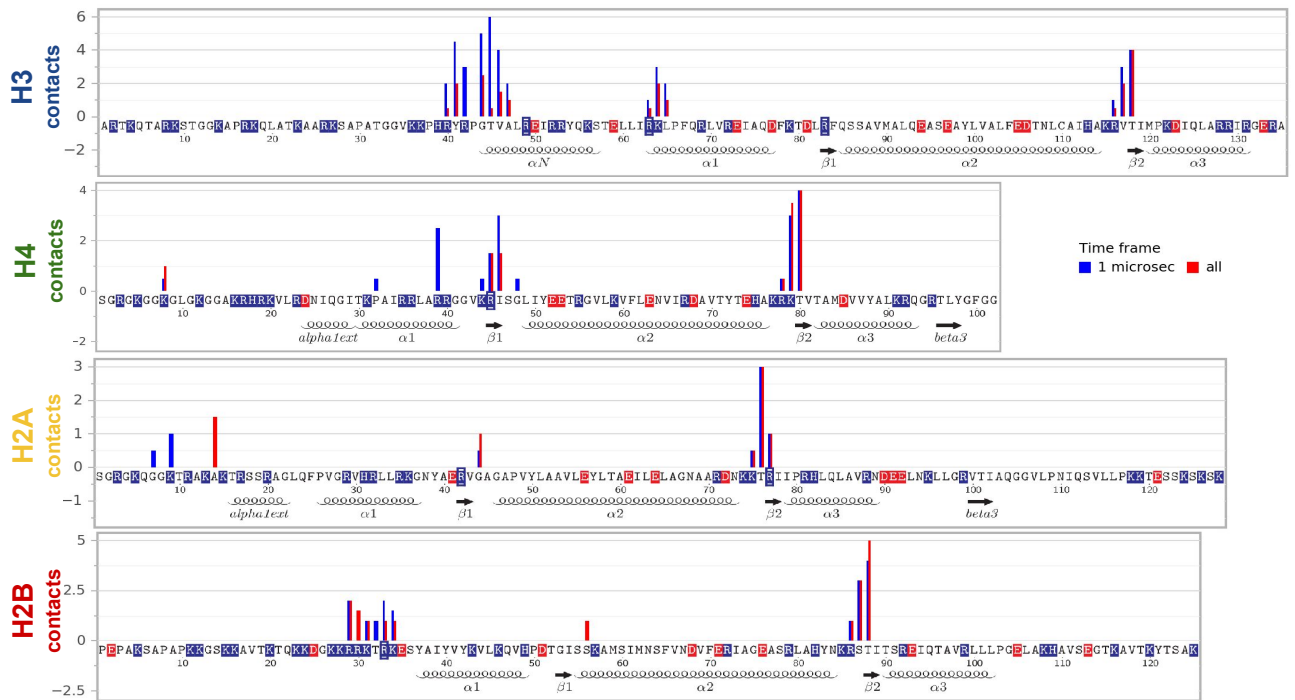

Supplementary Figure 3: Number of stable atom-atom contacts between histone residues and nucleosomal DNA plotted along the histone sequences for NCP<sub>147</sub> simulation. Stable atom-atom contacts are defined as those present in at least 40% of MD frames (the threshold is lower than for stable residue-nucleotide contacts because atom-atom contacts are less persistent). Contacts are averaged over symmetry-related histone chains. The data is shown for the first 1  $\mu$ s and the full 15  $\mu$ s trajectory.

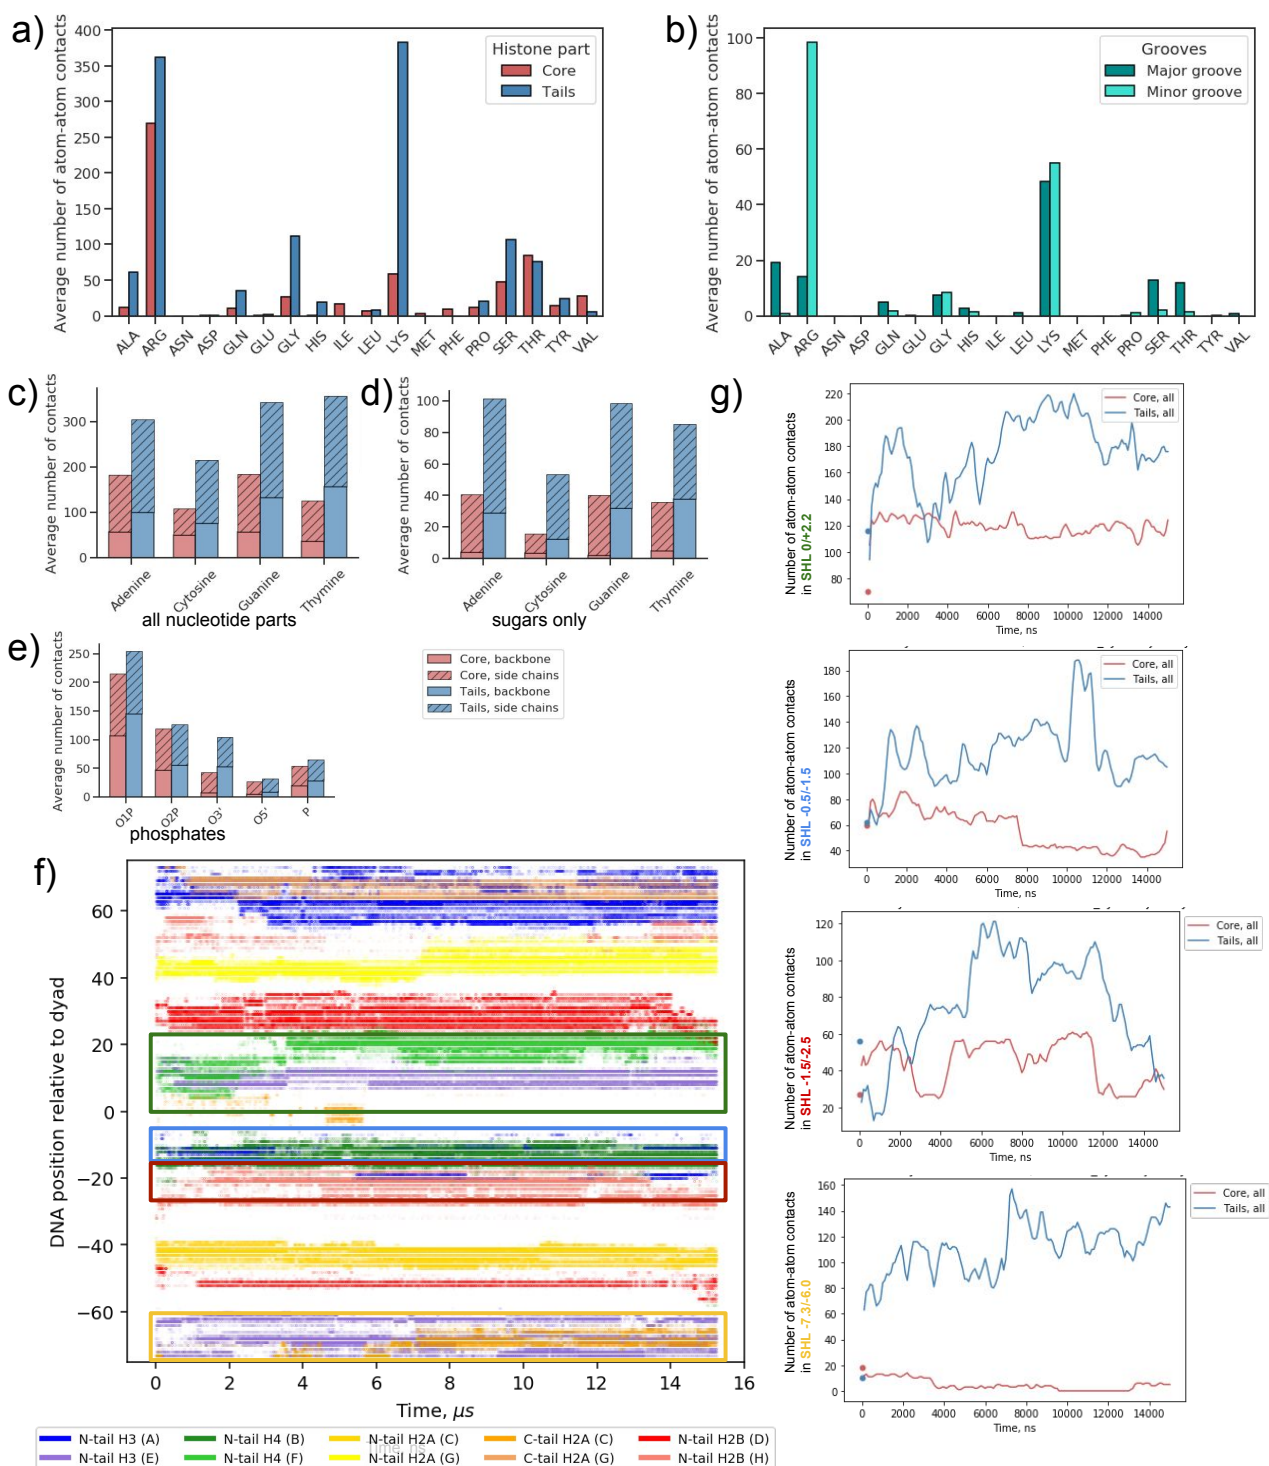

Supplementary Figure 4: Evolution and statistics of histone-DNA atom-atom contacts for NCP<sub>147</sub> simulations. a) Number of contacts classified by histone part and amino acid residue; b) contacts between histones and DNA bases classified by amino acid residue and DNA major/minor groove; c) contacts between histones and DNA classified by nucleotide; d) contacts between histones and DNA sugar moieties classified by nucleotide; e) contacts between histones and DNA phosphates classified by phosphate atoms; f) a map representing the evolution of interactions between histone tails and different positions in nucleosomal DNA; g) evolution of atom-atom contacts between core and tail parts of histones for different segments of nucleosomal DNA defined by their SHLs and highlighted by color boxes in panel f.



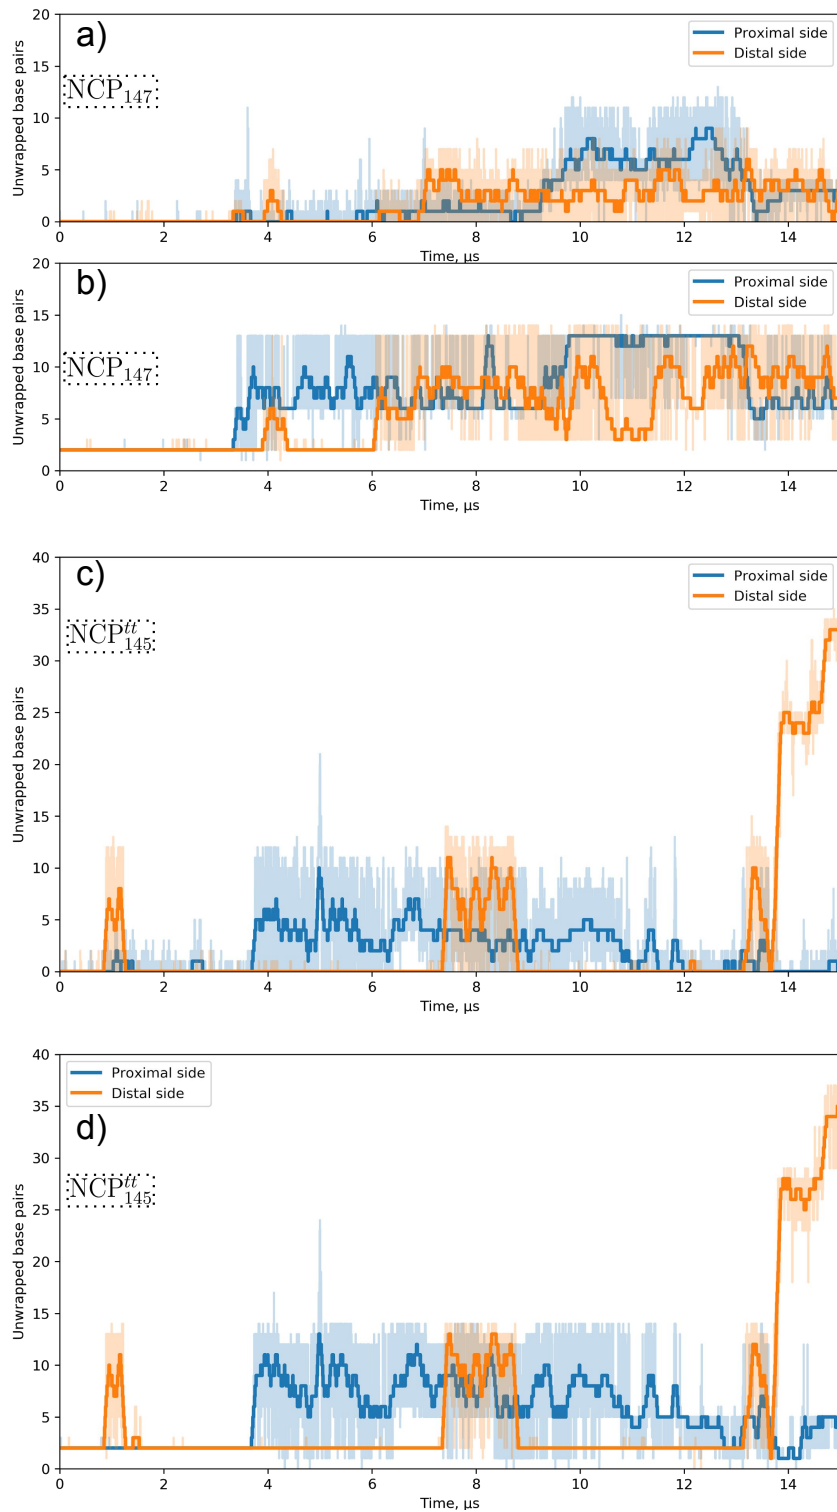

Supplementary Figure 5: Comparison of two approaches to quantify DNA unwrapping for NCP<sub>147</sub> and NCP<sup>tt</sup><sub>145</sub> systems. a),c) distance criterion: displacement of all the base pairs of the segment by more than 7 Å from the DNA path in the corresponding X-ray structure. b),d) contacts criterion: loss of contacts with the globular core (non-tail part) of the histone octamer.

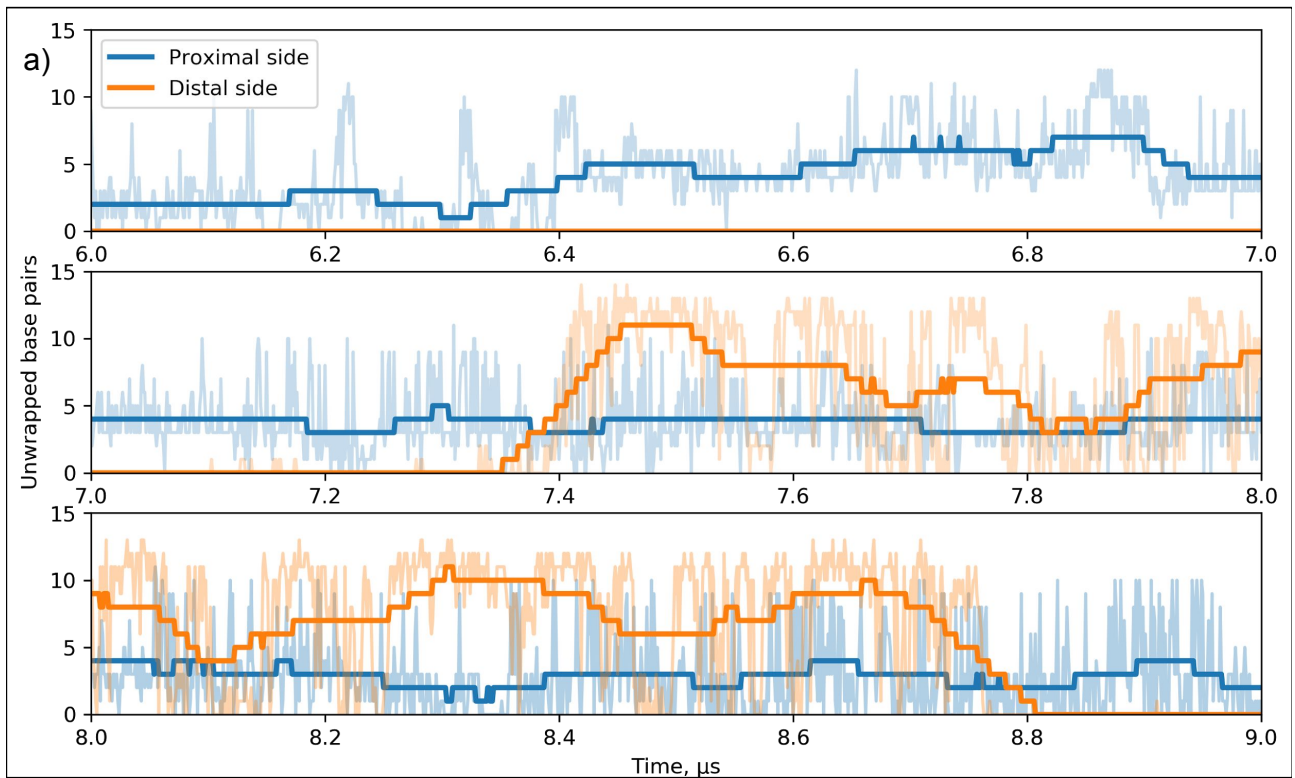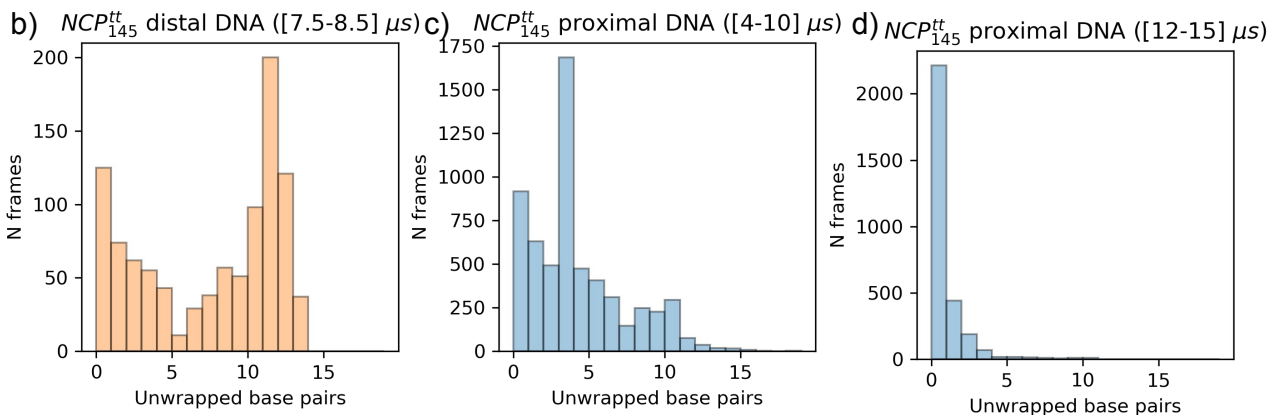

Supplementary Figure 6: A detailed view of DNA unwrapping dynamics for  $NCP_{145}^{tt}$  simulation. a) A zoom-up view of DNA unwrapping dynamics between 6-9  $\mu s$ . b) Histogram of different unwrap values for the distal DNA end sampled during period 7.5-8.5  $\mu s$ . c) Histogram of different unwrap values for the proximal DNA end sampled during period 4-10  $\mu s$ . d) Histogram of different unwrap values for the proximal DNA end sampled during period 12-15  $\mu s$ .

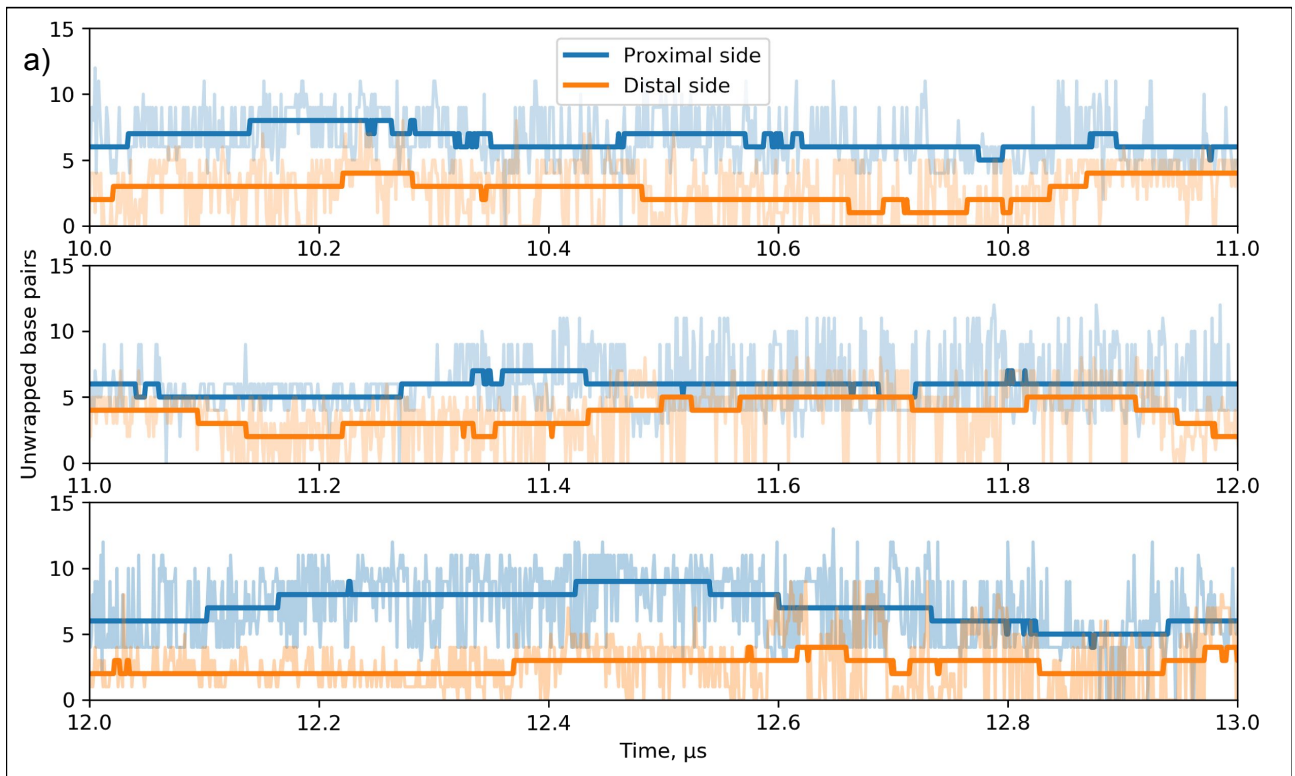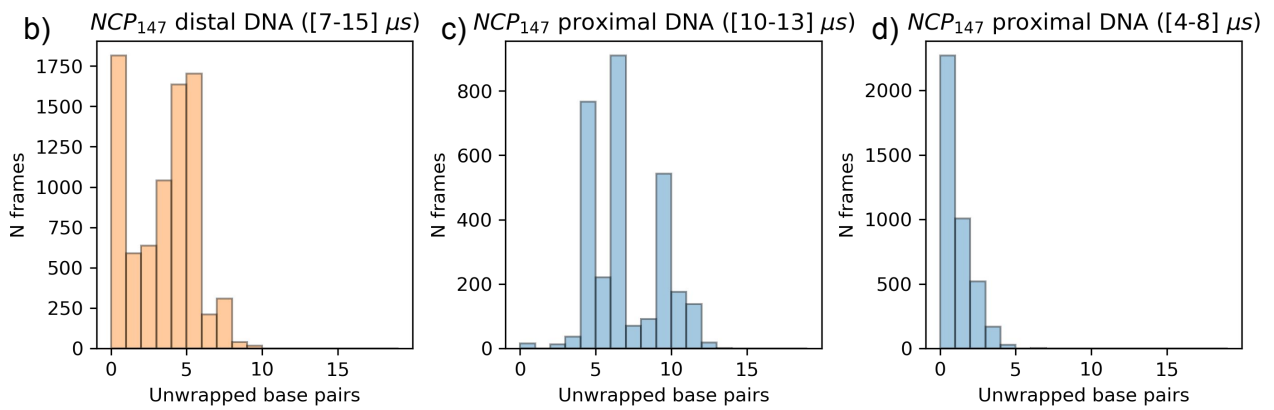

Supplementary Figure 7: A detailed view of DNA unwrapping dynamics for  $NCP_{147}$  simulation. a) A zoom-up view of DNA unwrapping dynamics between 10-13  $\mu s$ . b) Histogram of different unwrap values for the distal DNA end sampled during period 7-15  $\mu s$ . c) Histogram of different unwrap values for the proximal DNA end sampled during period 10-13  $\mu s$ . d) Histogram of different unwrap values for the proximal DNA end sampled during period 4-8  $\mu s$ .

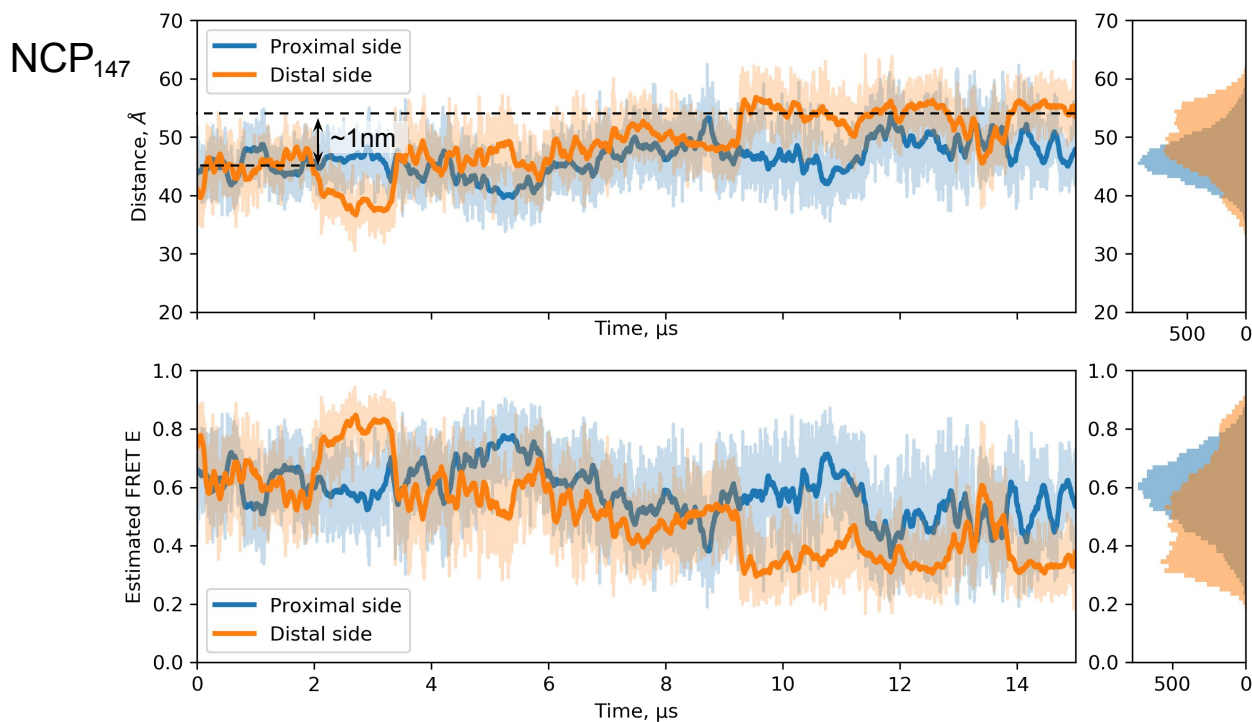

Supplementary Figure 8: Distances (top panel) and simulated FRET efficiencies (bottom panel) between FRET labels placed on DNA positions -73 and 2 for the proximal side and -2 and 73 for the distal side following ref. [5] for NCP<sub>147</sub>. We estimated the distances between the fluorescent dyes' attachment sites as the distances between O5' atoms of the sugar-phosphate backbone of the respective nucleotides. FRET efficiencies were calculated as  $E = \frac{1}{1 + (r/R_0)^6}$  where  $r$  is distance between dyes and Förster radius  $R_0 = 49\text{Å}$  as in ref. [5].

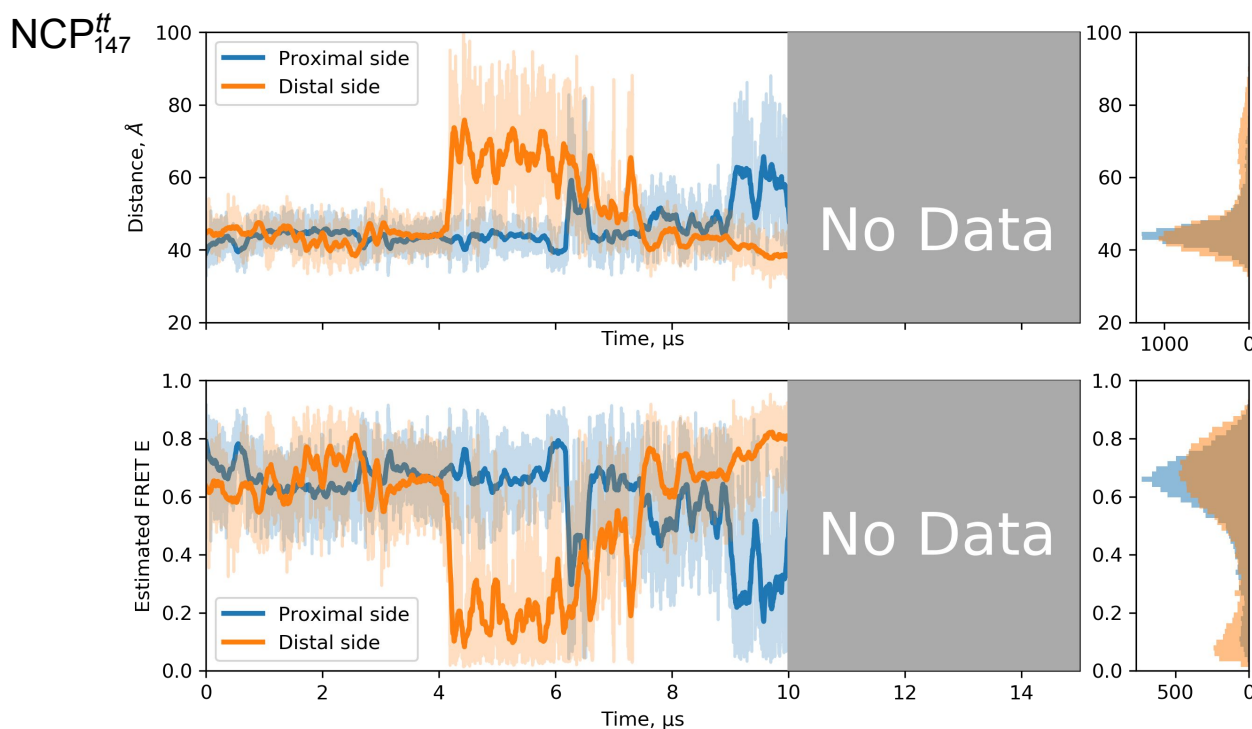

Supplementary Figure 9: Distances (top panel) and simulated FRET efficiencies (bottom panel) between FRET labels placed on DNA positions -73 and 2 for proximal side and -2 and 73 for distal side following ref. [5] for NCP<sub>147</sub><sup>tt</sup>. Distances and FRET efficiencies are measured as in 8.

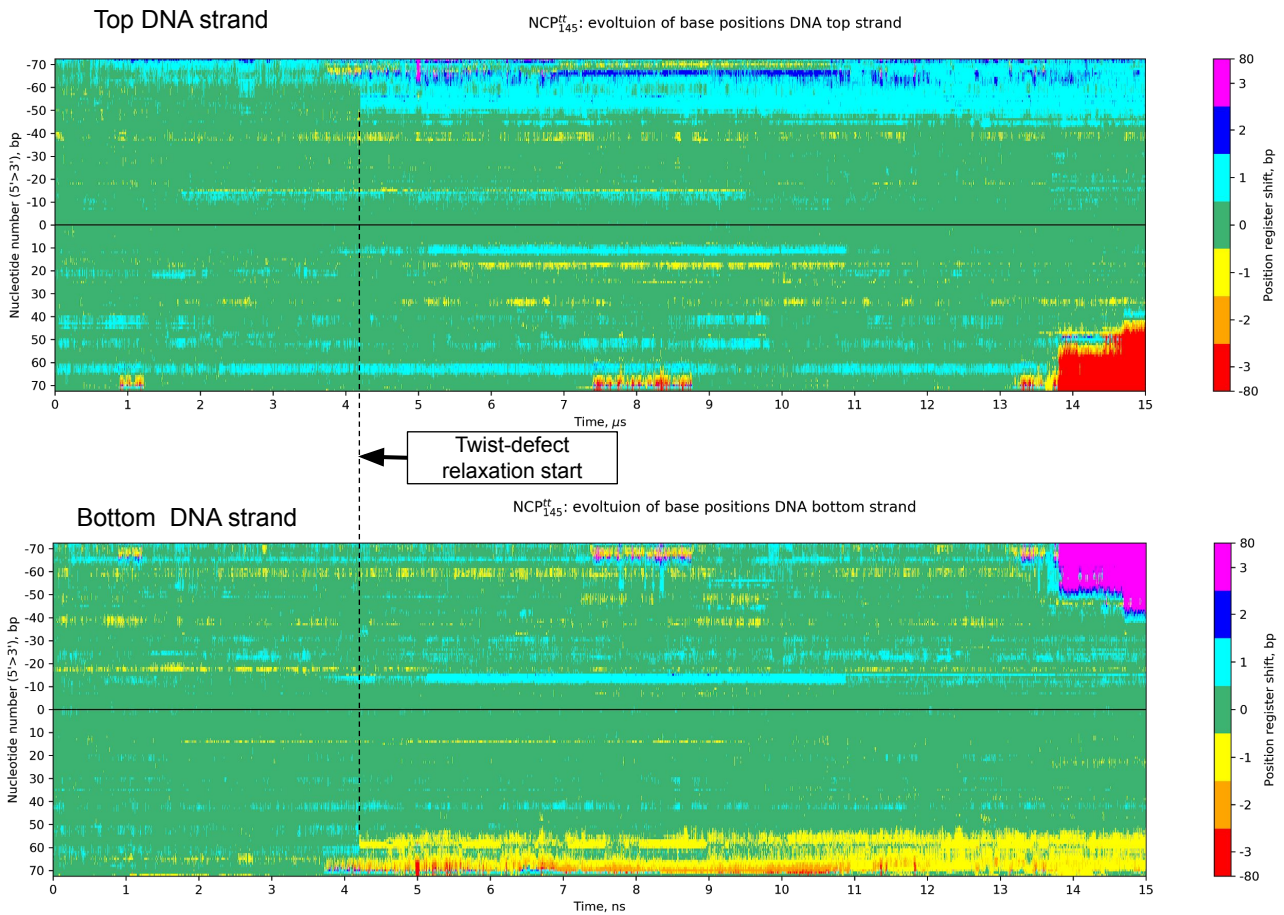

Supplementary Figure 10: DNA strand position register shift during simulations of NCP<sub>145</sub><sup>tt</sup>. The plot is similar to Figure 7b, but shows data for the full range of the bottom and top DNA strands.

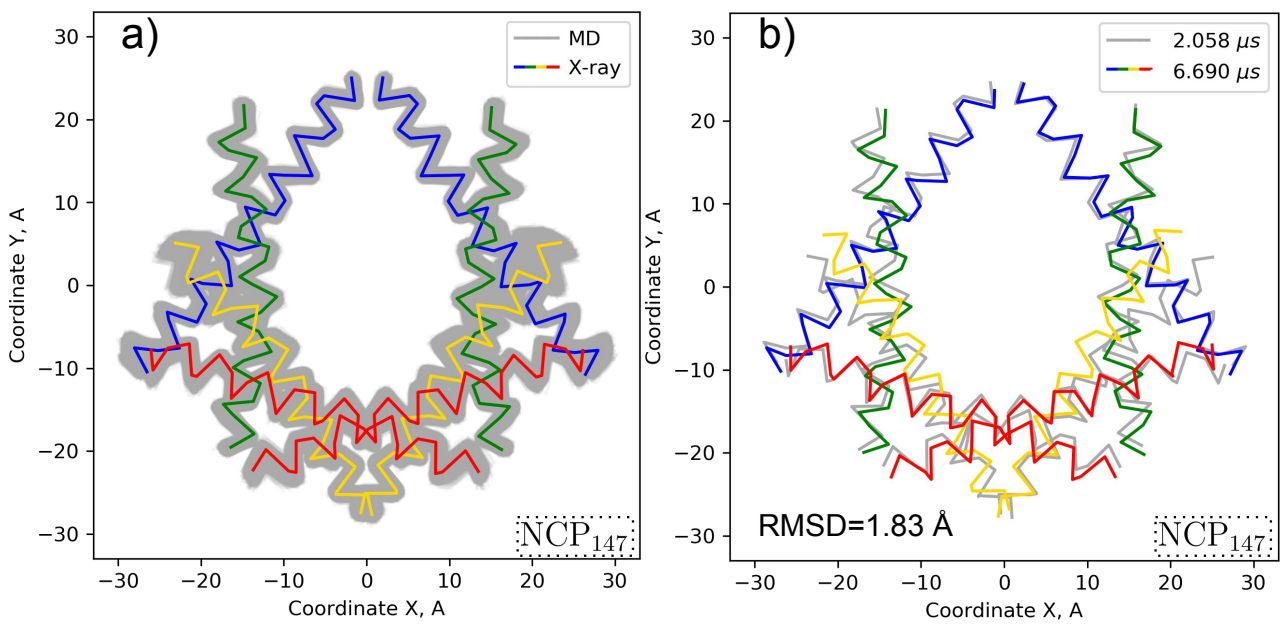

Supplementary Figure 11: Analysis of histone octamer plasticity in NCP<sub>147</sub> simulation. The description is similar to Figure 8

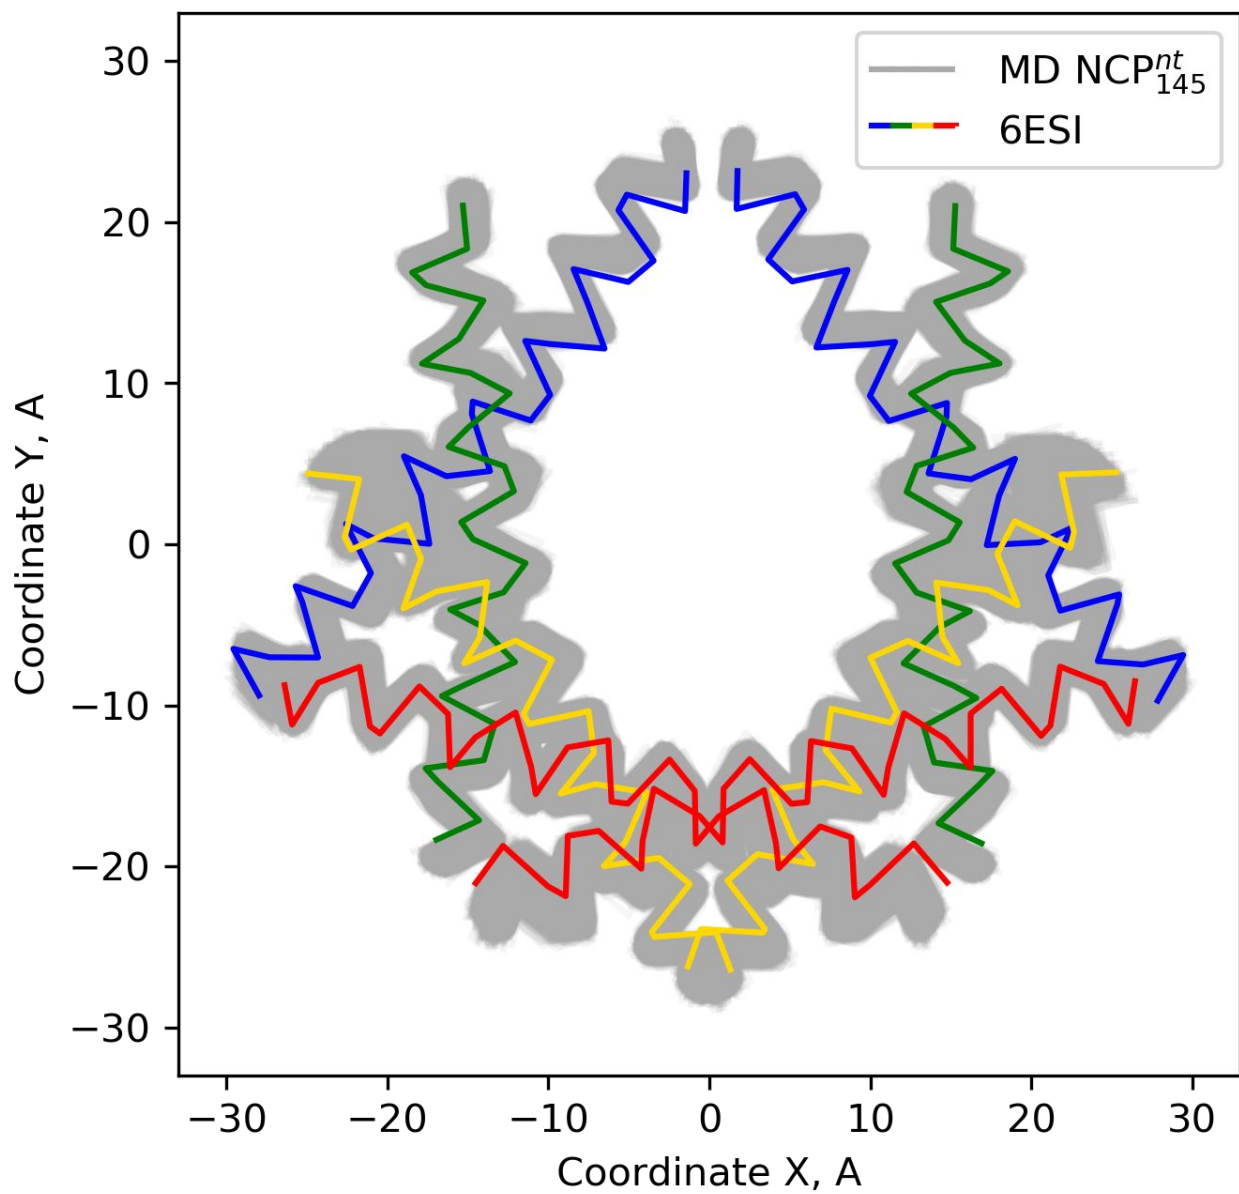

Supplementary Figure 12: 2D projections of the histone  $\alpha 2$ -helices from NCP<sub>145</sub><sup>nt</sup> simulation vs. their projections in the recently reported deformed (squeezed by 8% along the dyad) NCP structure seen in cryo-EM (PDB ID 6FQ6).

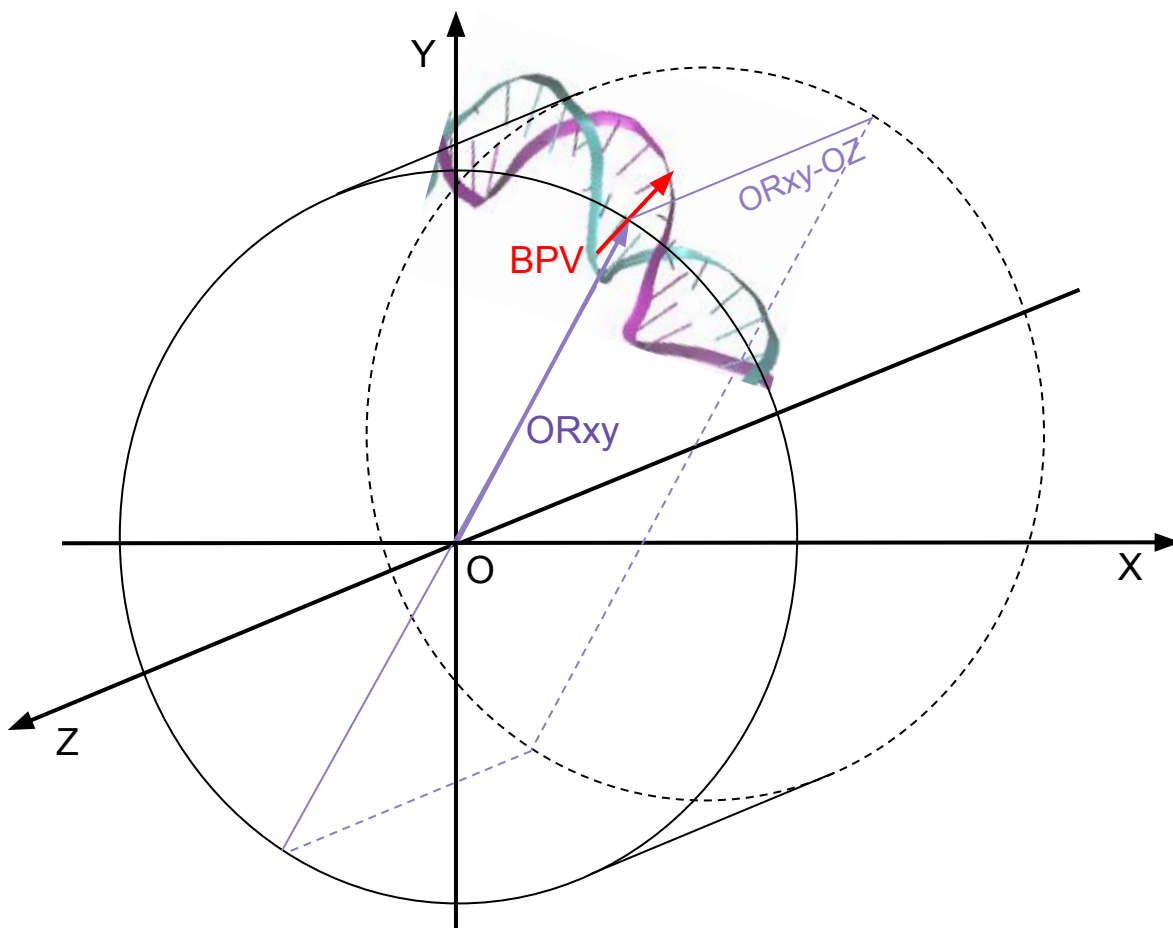

Supplementary Figure 13: Schematic description of relative twist (rTw) determination. **BPV** - base pair vector, **OR<sub>xy</sub>** - radial vector in cylindrical coordinate system, **OZ** - superhelical axis. rTw is defined as the angle between **BPV** projection onto the **OR<sub>xy</sub>-OZ** plane and **OXY** plane.

## Supplementary References

- [1] Davey, C. A., Sargent, D. F., Luger, K., Maeder, A. W. & Richmond, T. J. Solvent mediated interactions in the structure of the nucleosome core particle at 1.9 Å resolution **319**, 1097–1113 (2002).
- [2] Luger, K., Mäder, A. W., Richmond, R. K., Sargent, D. F. & Richmond, T. J. Crystal structure of the nucleosome core particle at 2.8 Å resolution **389**, 251–260 (1997).
- [3] Vasudevan, D., Chua, E. Y. D. & Davey, C. A. Crystal Structures of Nucleosome Core Particles Containing the ‘601’ Strong Positioning Sequence **403**, 1–10 (2010).
- [4] Pettersen, E. F. *et al.* UCSF Chimera—a visualization system for exploratory research and analysis **25**, 1605–1612 (2004).
- [5] Wei, S., Falk, S. J., Black, B. E. & Lee, T.-H. A novel hybrid single molecule approach reveals spontaneous DNA motion in the nucleosome **43**, e111 (2015).
